# Supplementary material for: Synthesis, Self-Assembly in Crystalline Phase and Anti-Tumor Activity of 2-(2-/4-Hydroxybenzylidene)thiazolo[3,2-a]pyrimidines
Source: MDPI journal article supplement (doi:10.3390/molecules27227747), 2022-11-10

Supplementary Materials for:

**Synthesis, self-assembly in crystalline phase and antitumor activity of 2-(2- / 4-hydroxybenzylidene)thiazolo[3,2-*a*]pyrimidines**

Artem S. Agarkov <sup>1</sup>, Anna A. Nefedova <sup>1</sup>, Elina R. Gabitova <sup>2</sup>, Alexander S. Ovsyannikov <sup>1</sup>, Syumbelya K. Amerhanova <sup>1</sup>, Anna P. Lyubina <sup>1</sup>, Alexandra D. Voloshina <sup>1</sup>, Pavel V. Dorovatovskii <sup>3</sup>, Igor A. Litvinov <sup>1</sup>, Svetlana E. Solovieva <sup>1</sup> and Igor S. Antipin <sup>1,\*</sup>

Arbuzov Institute of Organic and Physical Chemistry, FRC Kazan Scientific Center, Russian Academy of Sciences, Arbuzova 8, 420088 Kazan, Russia;

<sup>2</sup> Kazan Federal University, Kremlevskaya 18, 420008 Kazan, Russia;

<sup>3</sup> National Research Center “Kurchatov Institute”, Akademika Kurchatova 1, 123182 Moscow, Russia;

\* Correspondence: iantipin54@yandex.ru

**Figure S1.** <sup>1</sup>H NMR spectrum of compound 10 (DMSO-*d*<sub>6</sub>, 400 MHz, 25°C).

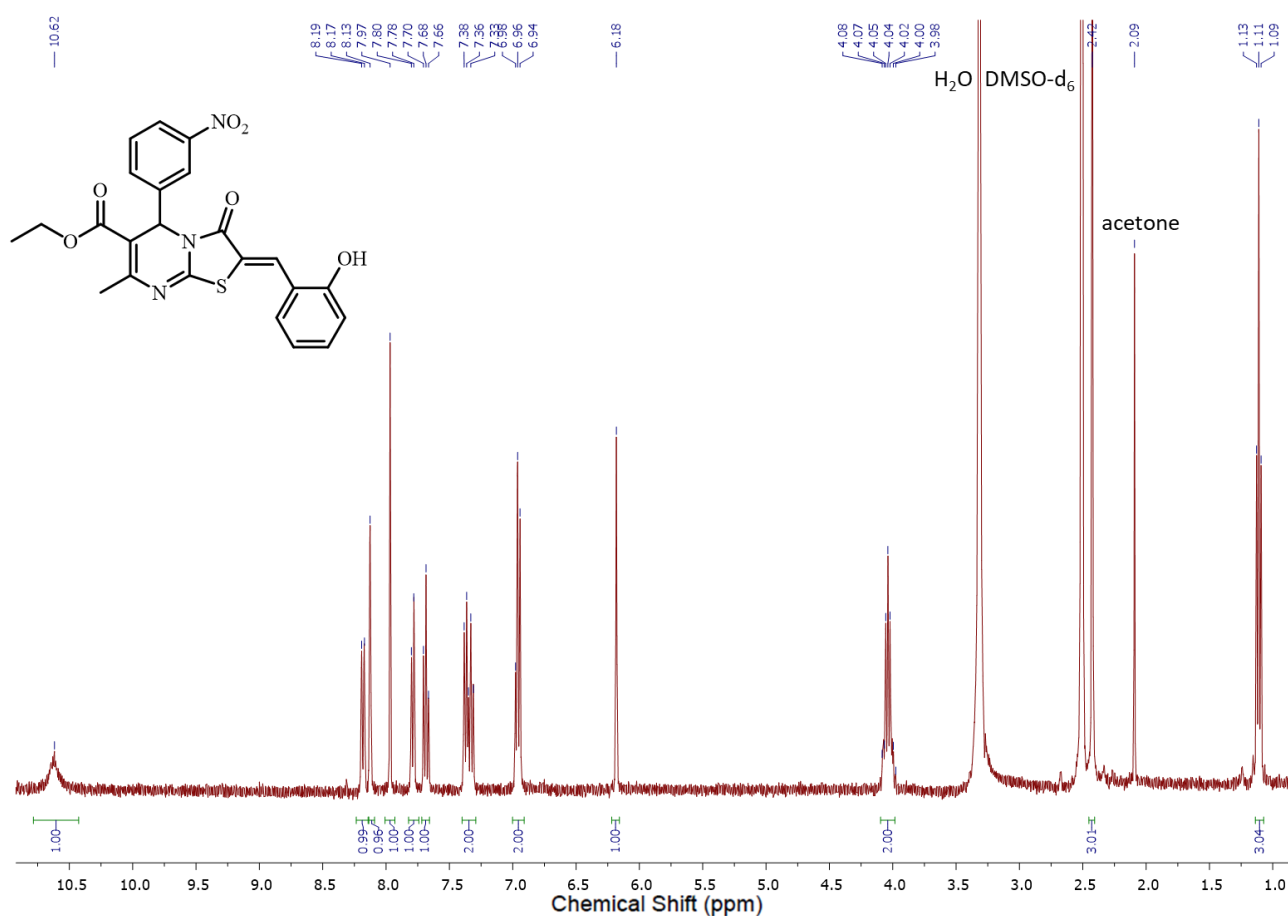

**Figure S2.**  $^{13}\text{C}$  NMR spectrum of compound **10** (DMSO- $\text{d}_6$ , 100 MHz, 25°C).

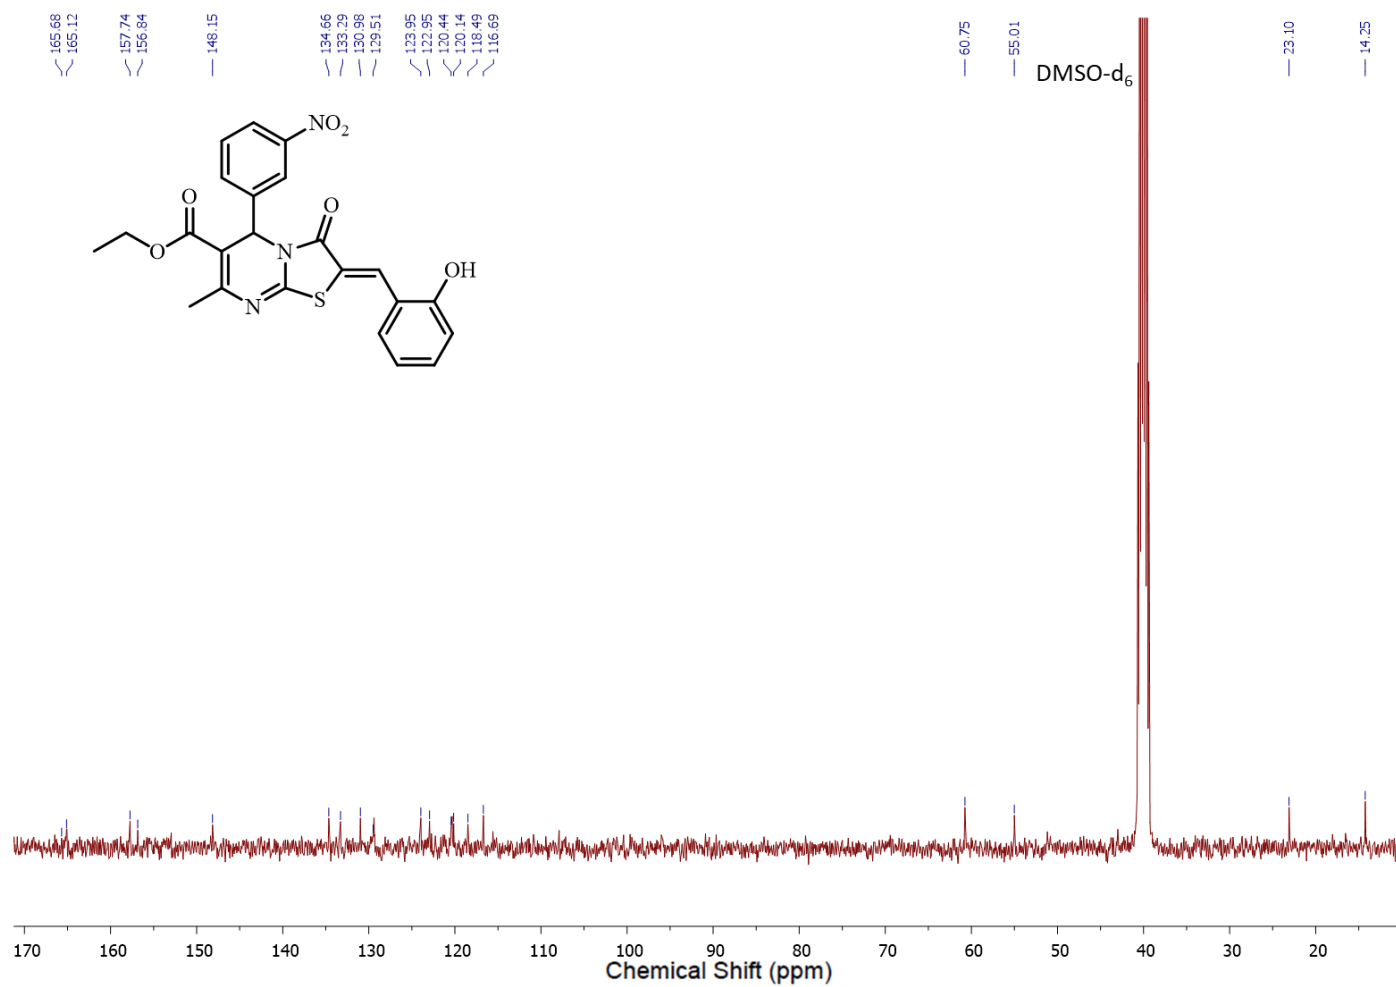

**Figure S3.** ESI MS spectrum of compound **10** (Ion Polarity: Positive).

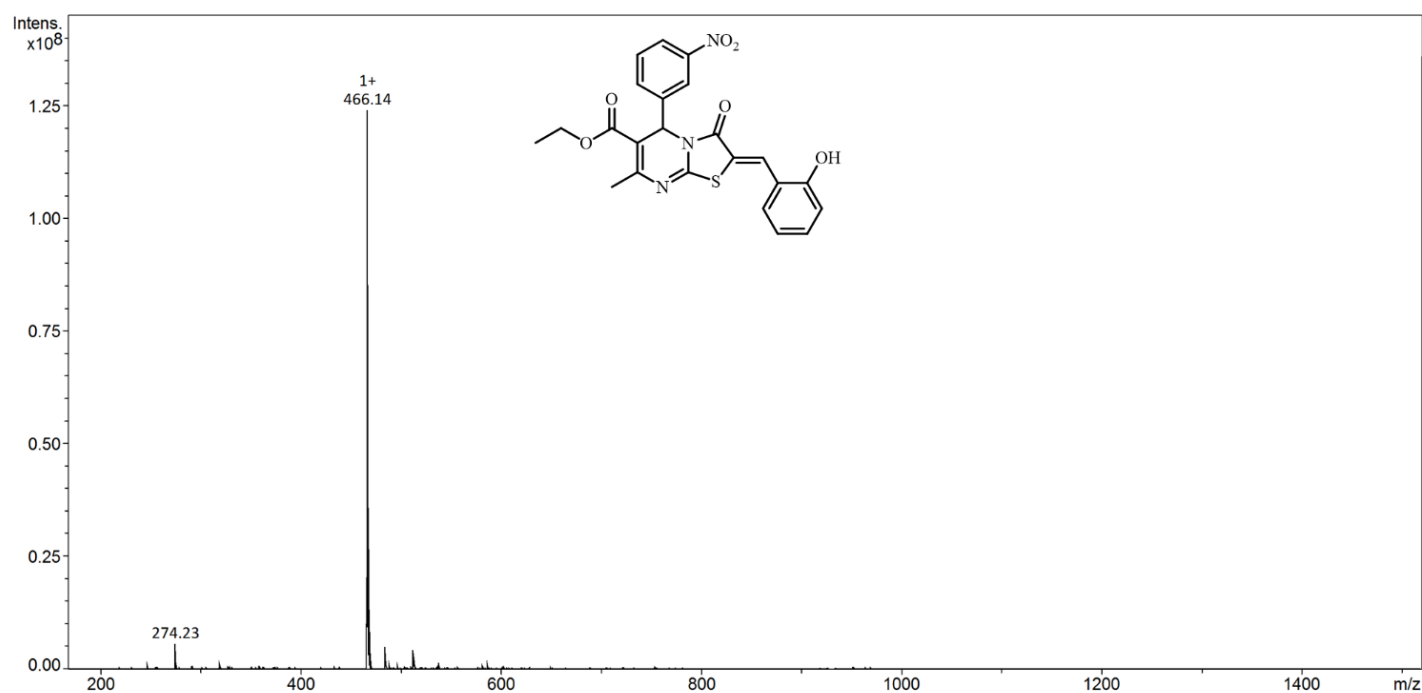

Figure S4. IR spectrum of compound 10 (KBr tablet).

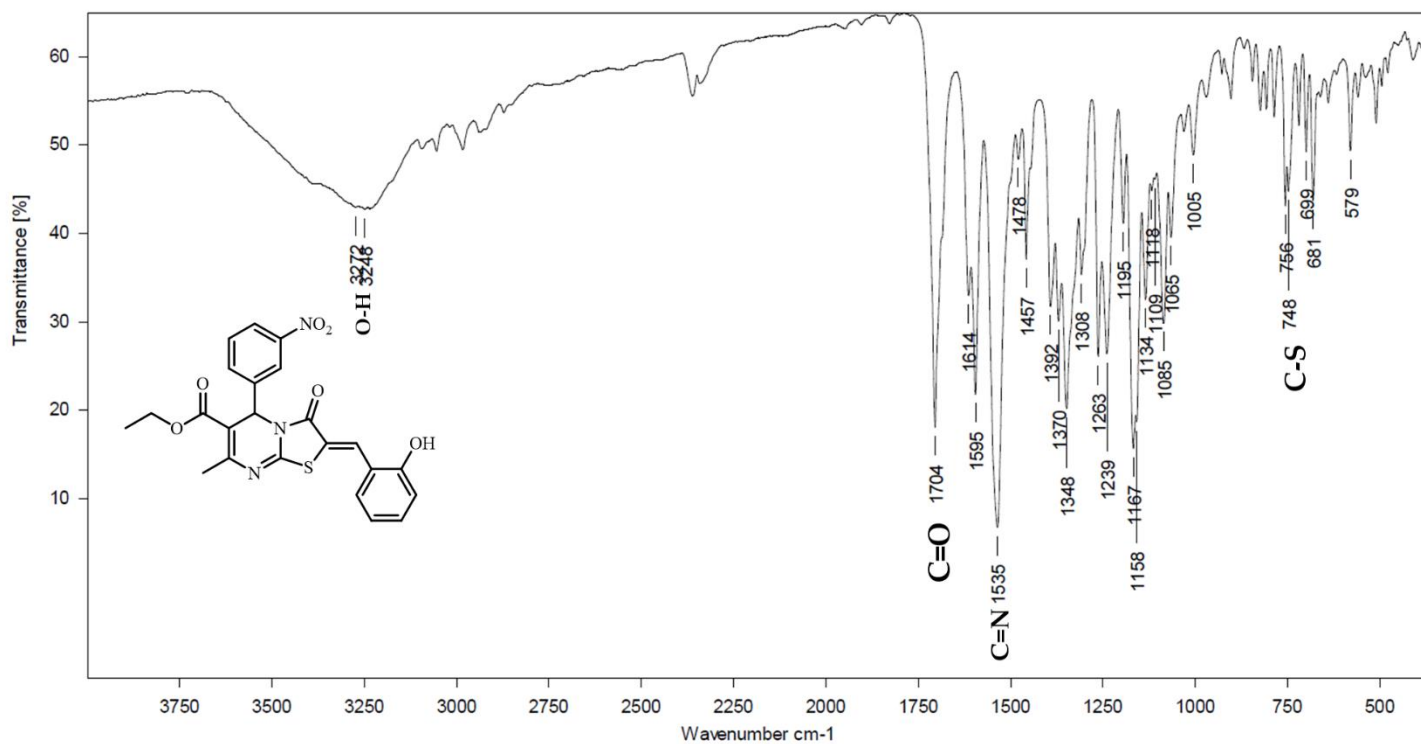

Figure S5. <sup>1</sup>H NMR spectrum of compound 11 (DMSO-d<sub>6</sub>, 400 MHz, 25°C).

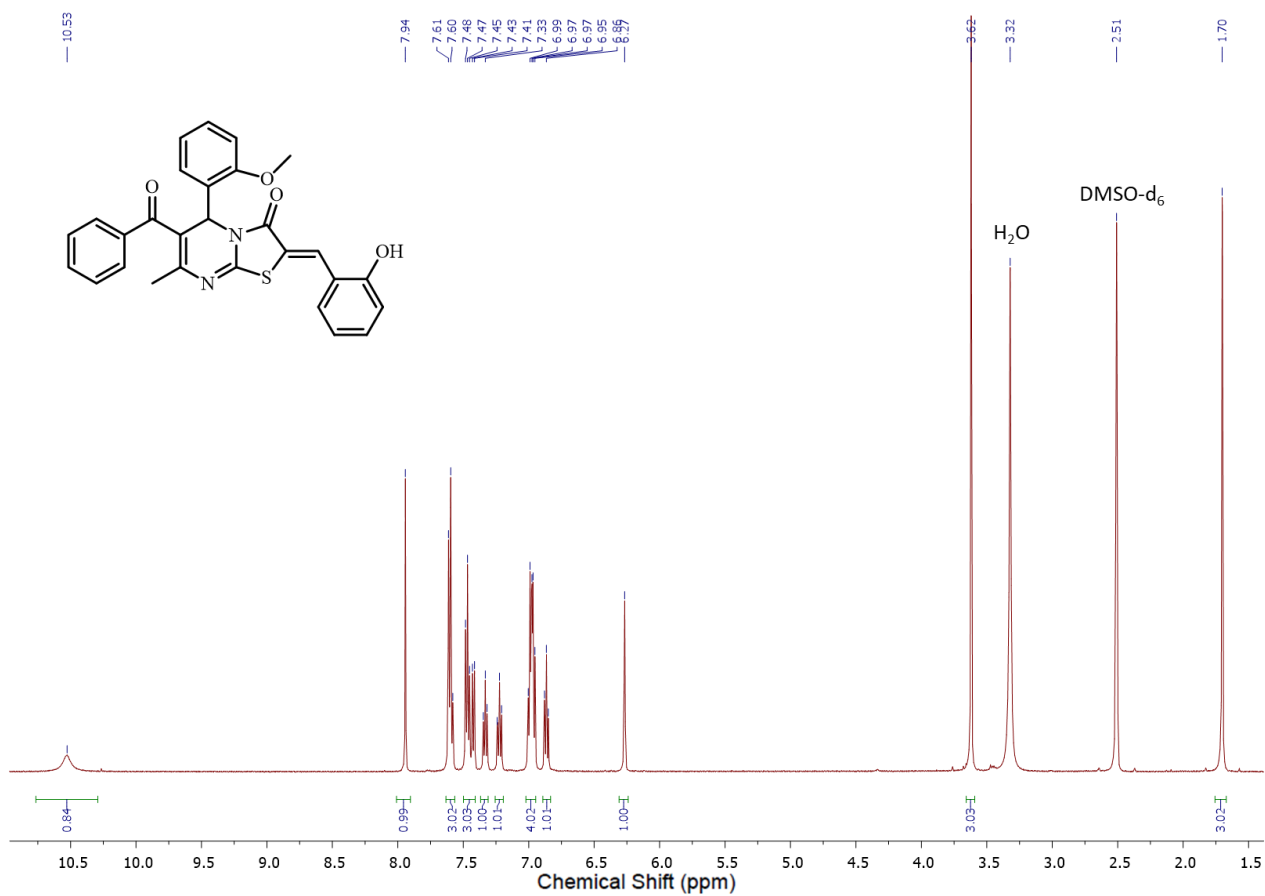

**Figure S6.**  $^{13}\text{C}$  NMR spectrum of compound **11** (DMSO- $\text{d}_6$ , 100 MHz, 25°C).

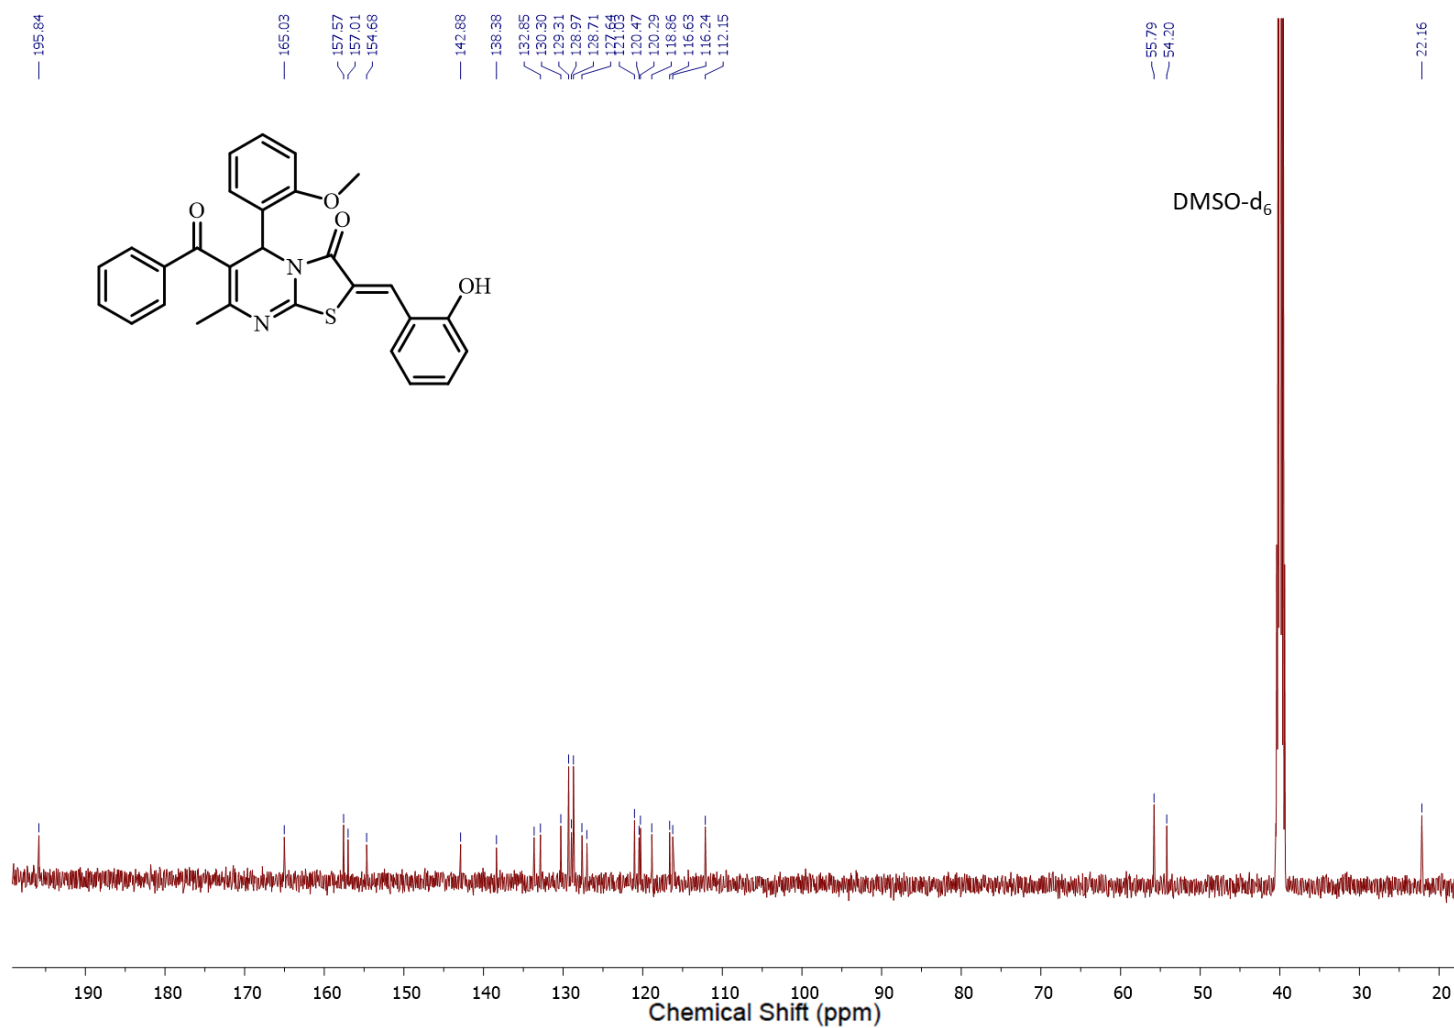

**Figure S7.** ESI MS spectrum of compound **11** (Ion Polarity: Positive).

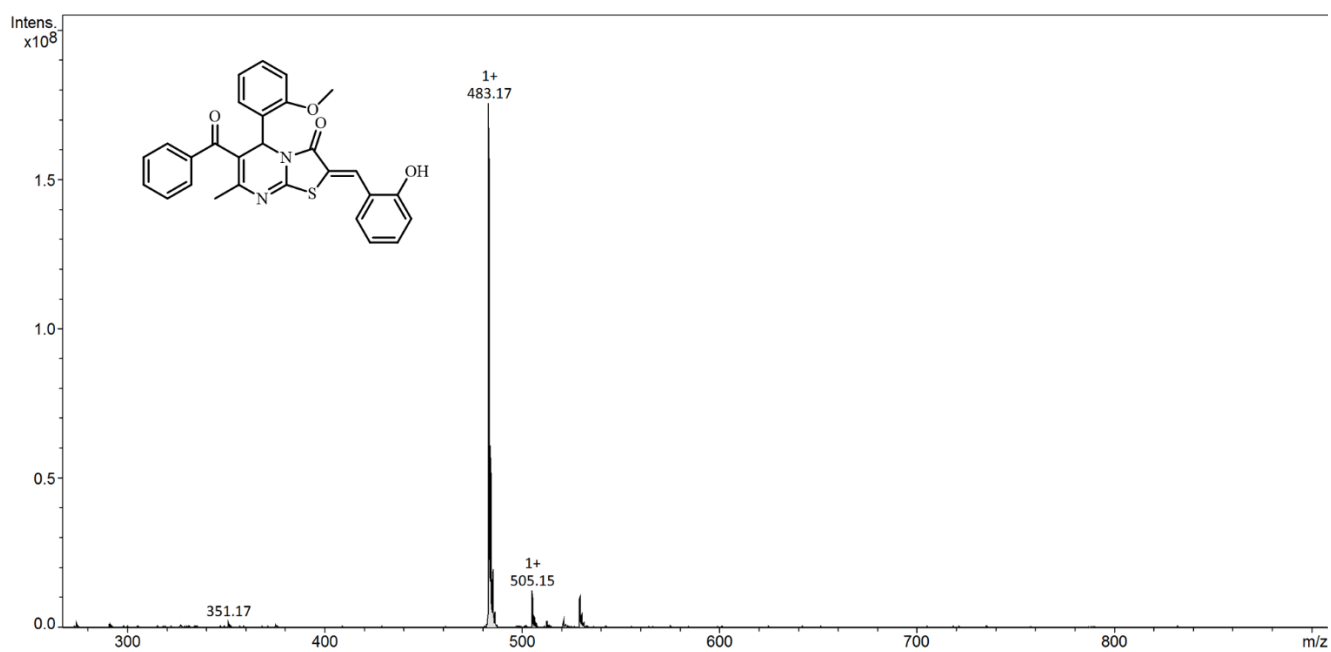

**Figure S8.** IR spectrum of compound **11** (KBr tablet).

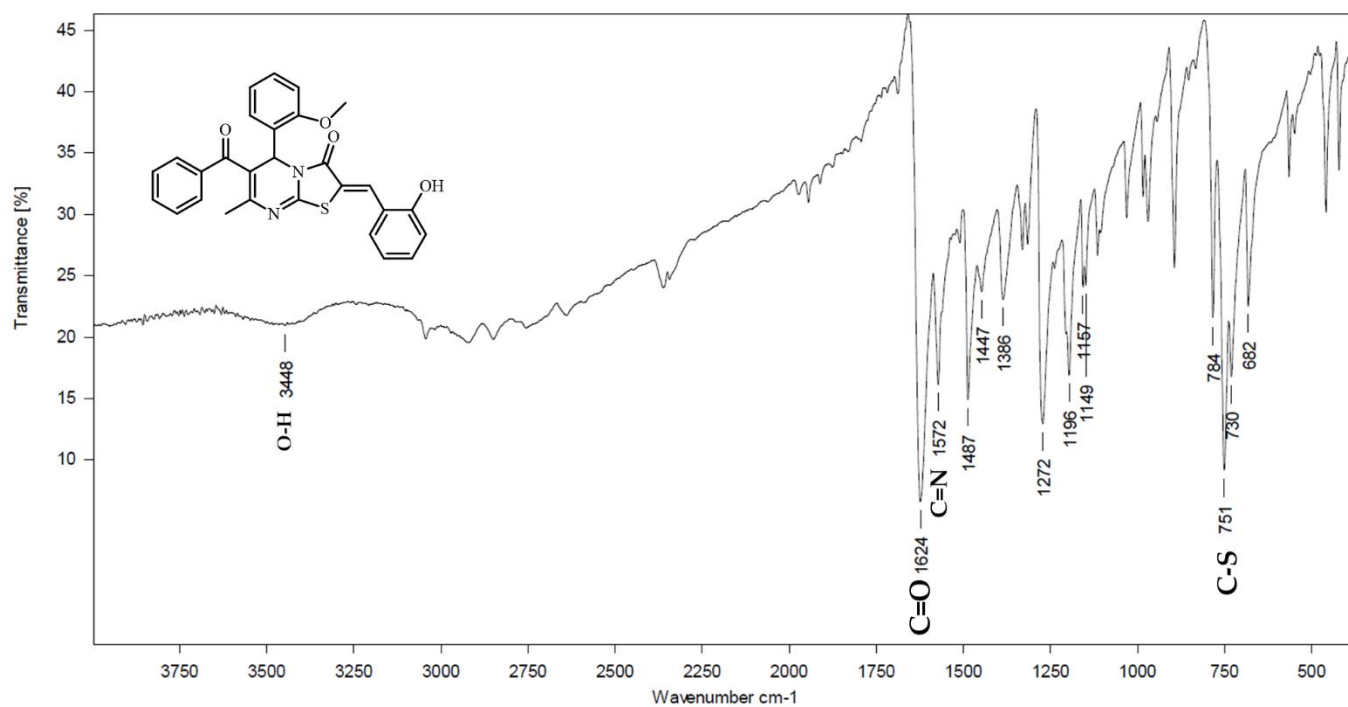

**Figure S9.**  $^1\text{H}$  NMR spectrum of compound **12** ( $\text{DMSO-d}_6$ , 400 MHz,  $25^\circ\text{C}$ ).

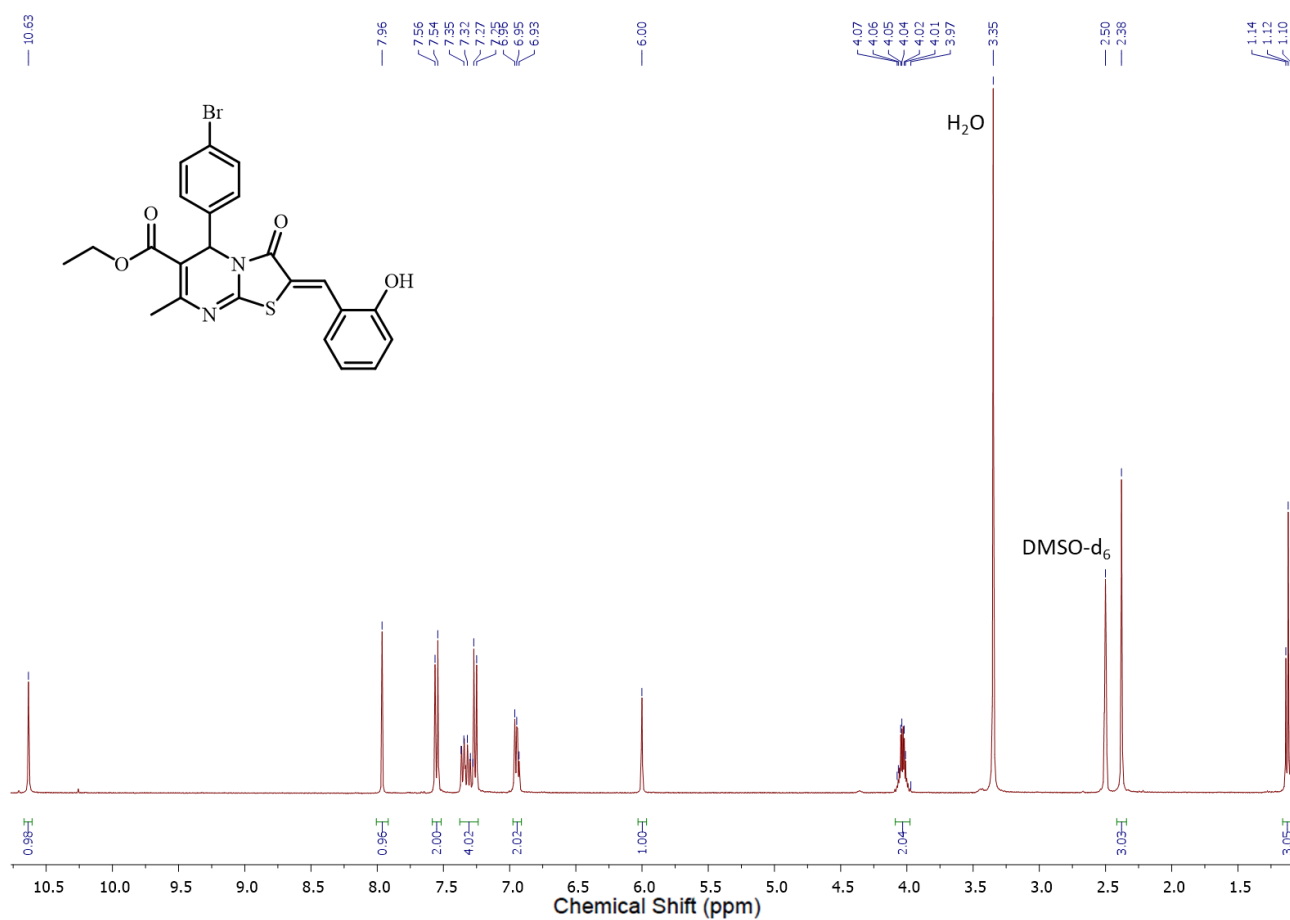

**Figure S10.**  $^{13}\text{C}$  NMR spectrum of compound **12** (DMSO- $d_6$ , 100 MHz, 25°C).

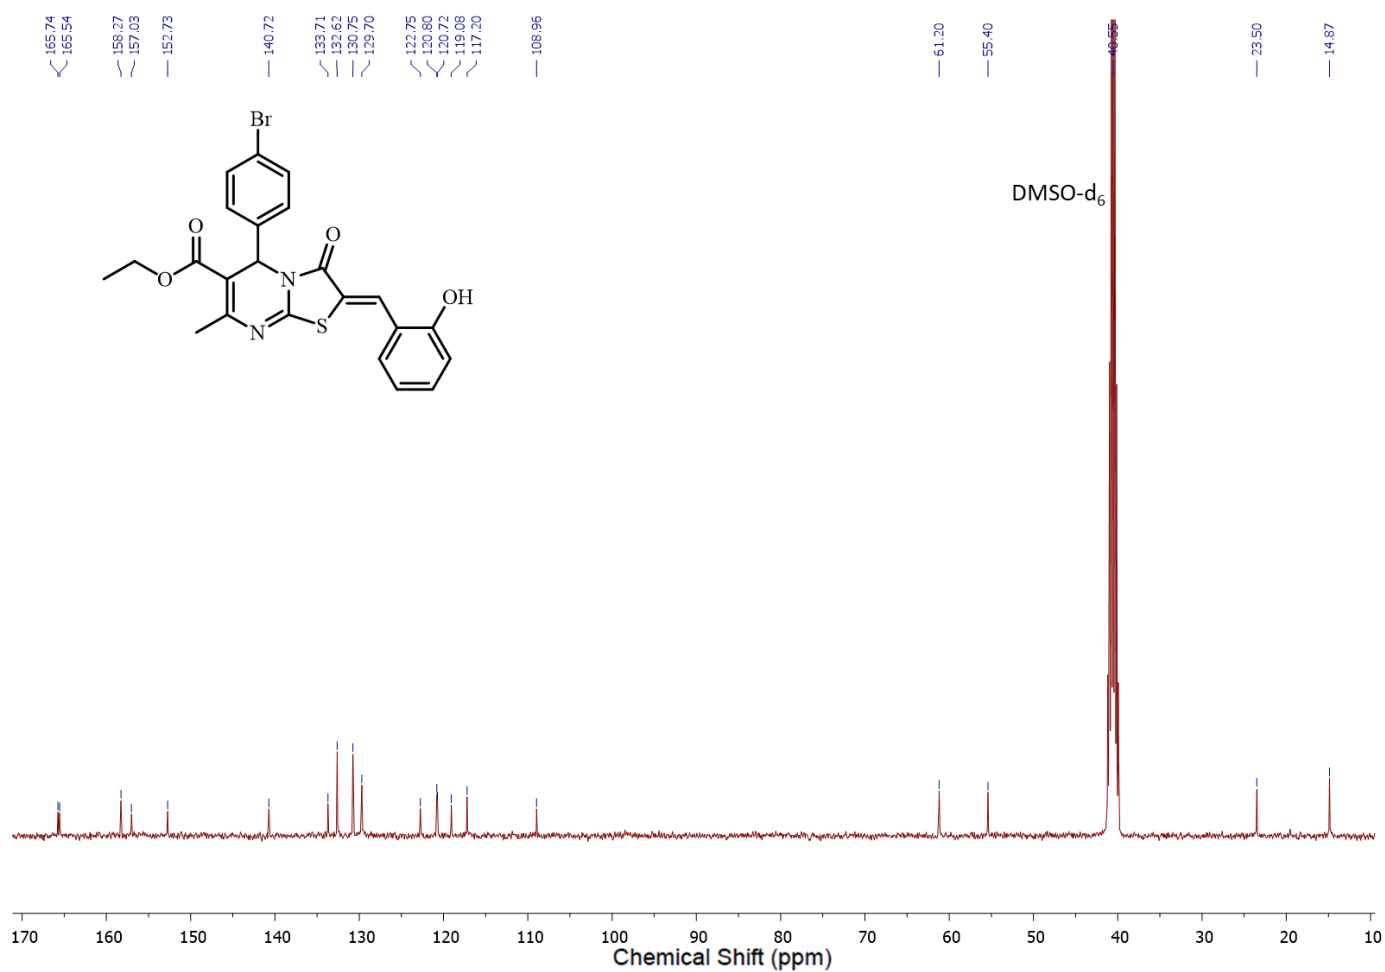

**Figure S11.** ESI MS spectrum of compound **12** (Ion Polarity: Positive).

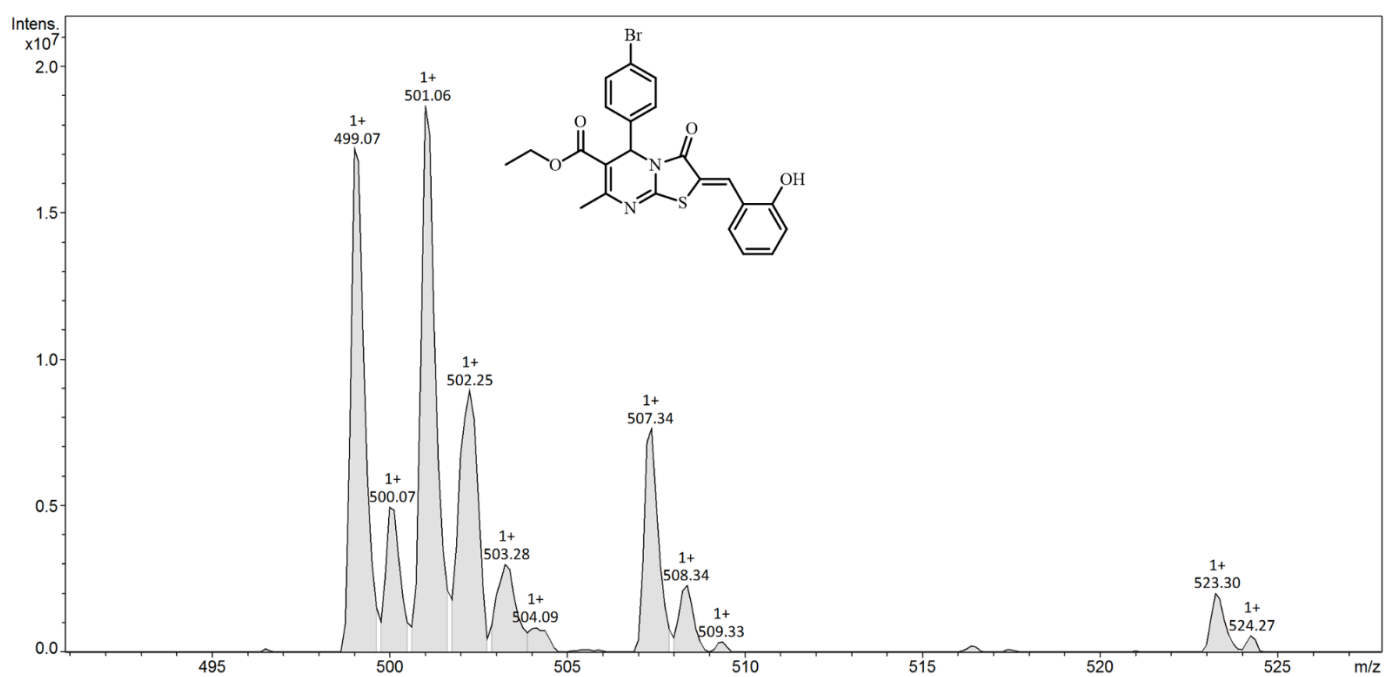

**Figure S12.** IR spectrum of compound **12** (KBr tablet).

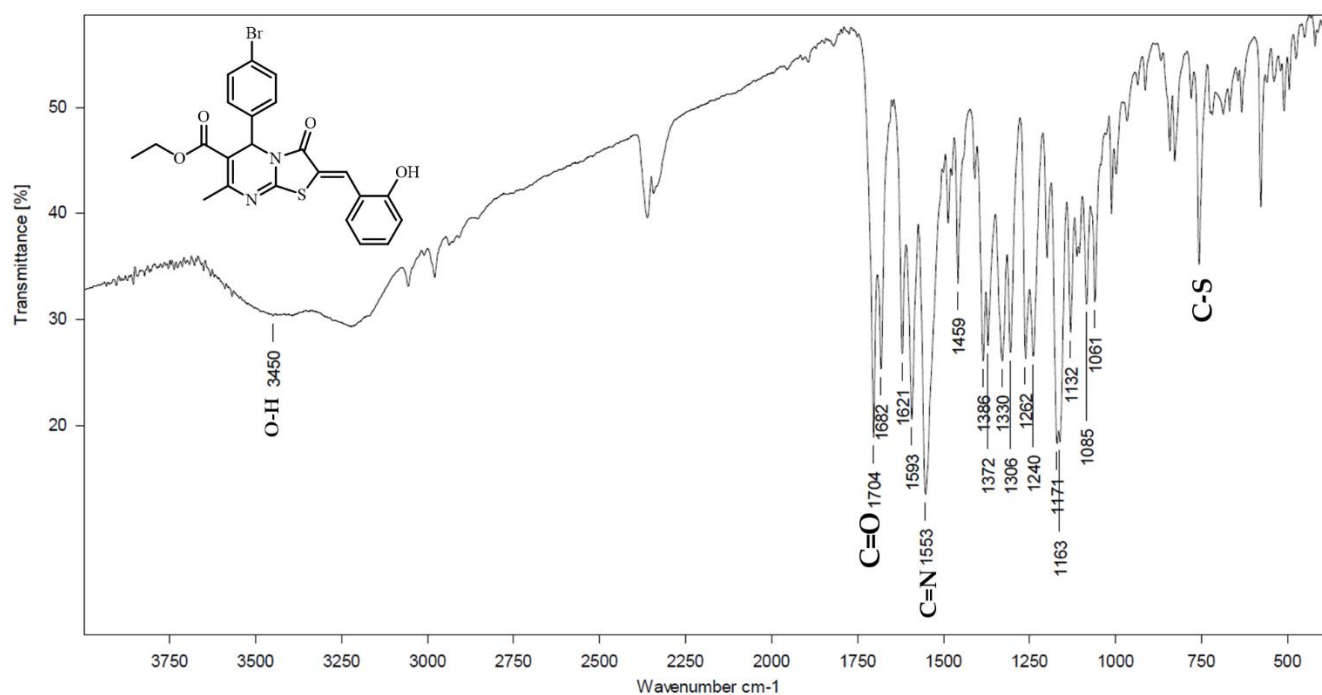

**Figure S13.**  $^1\text{H}$  NMR spectrum of compound **14** (DMSO- $d_6$ , 600 MHz, 25°C).

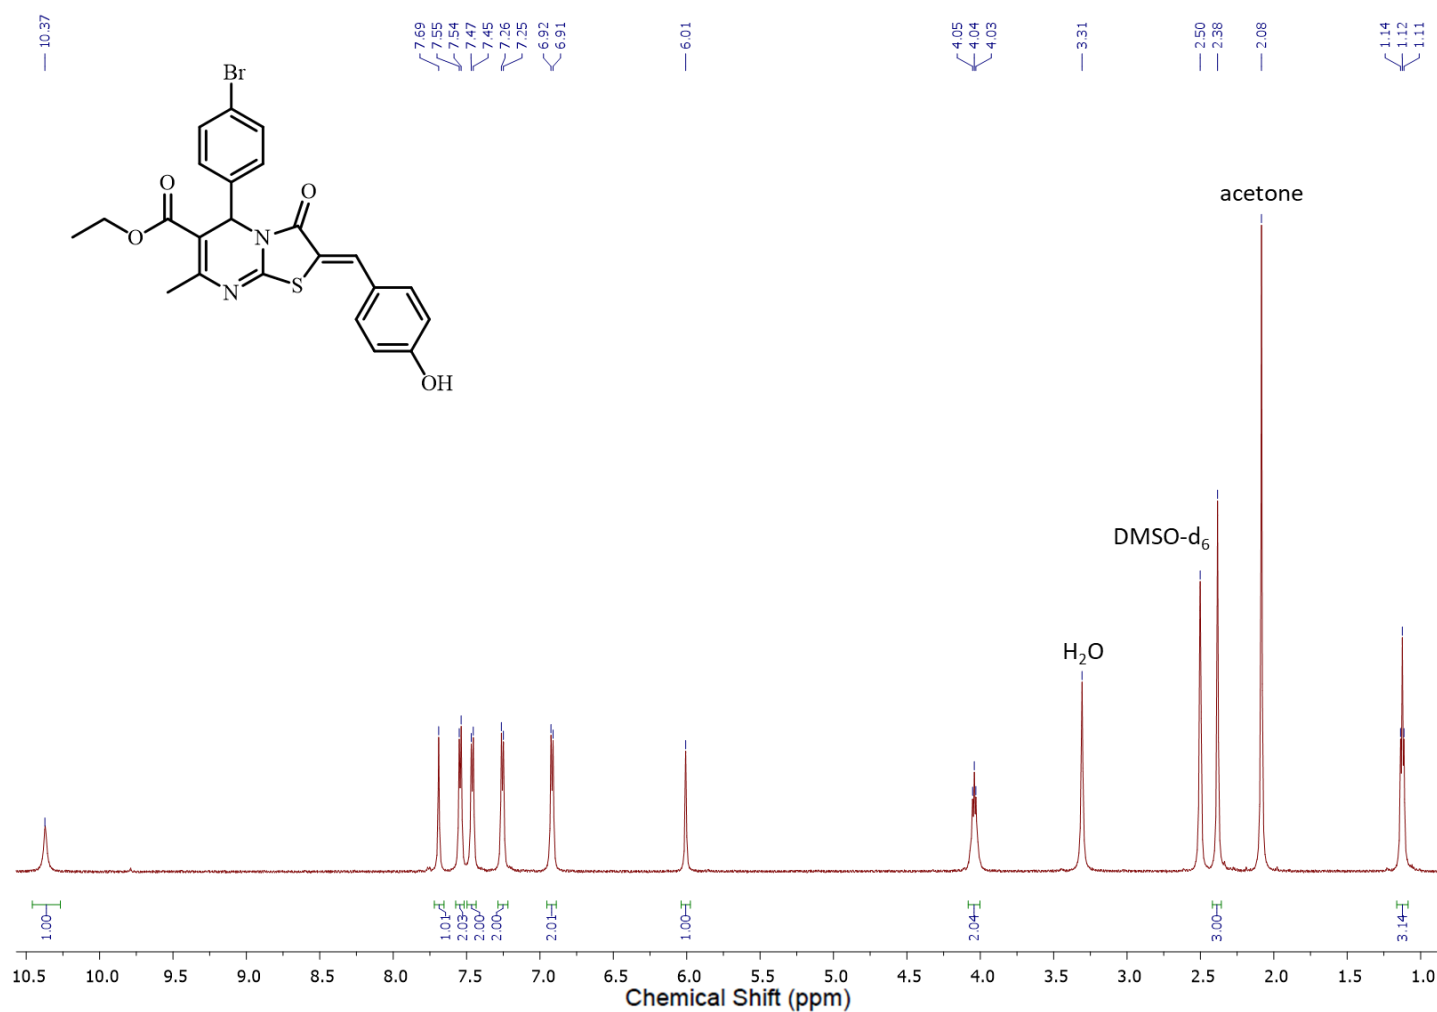

**Figure S14.**  $^{13}\text{C}$  NMR spectrum of compound **14** (DMSO- $d_6$ , 100 MHz, 25°C).

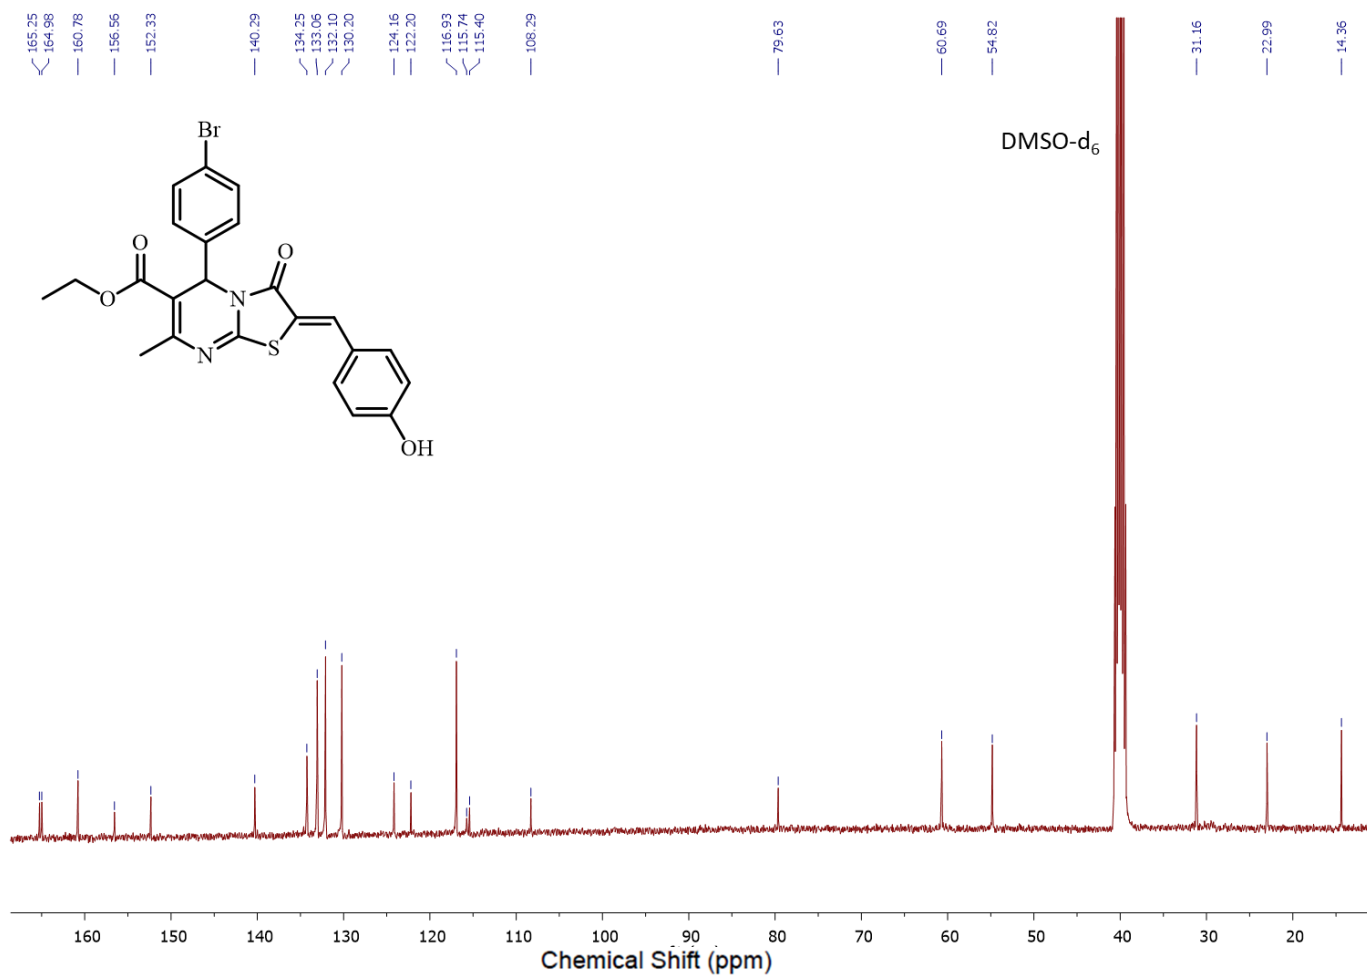

**Figure S15.** IR spectrum (KBr tablet) and ESI MS spectrum (Ion Polarity: Positive) of compound **14**.

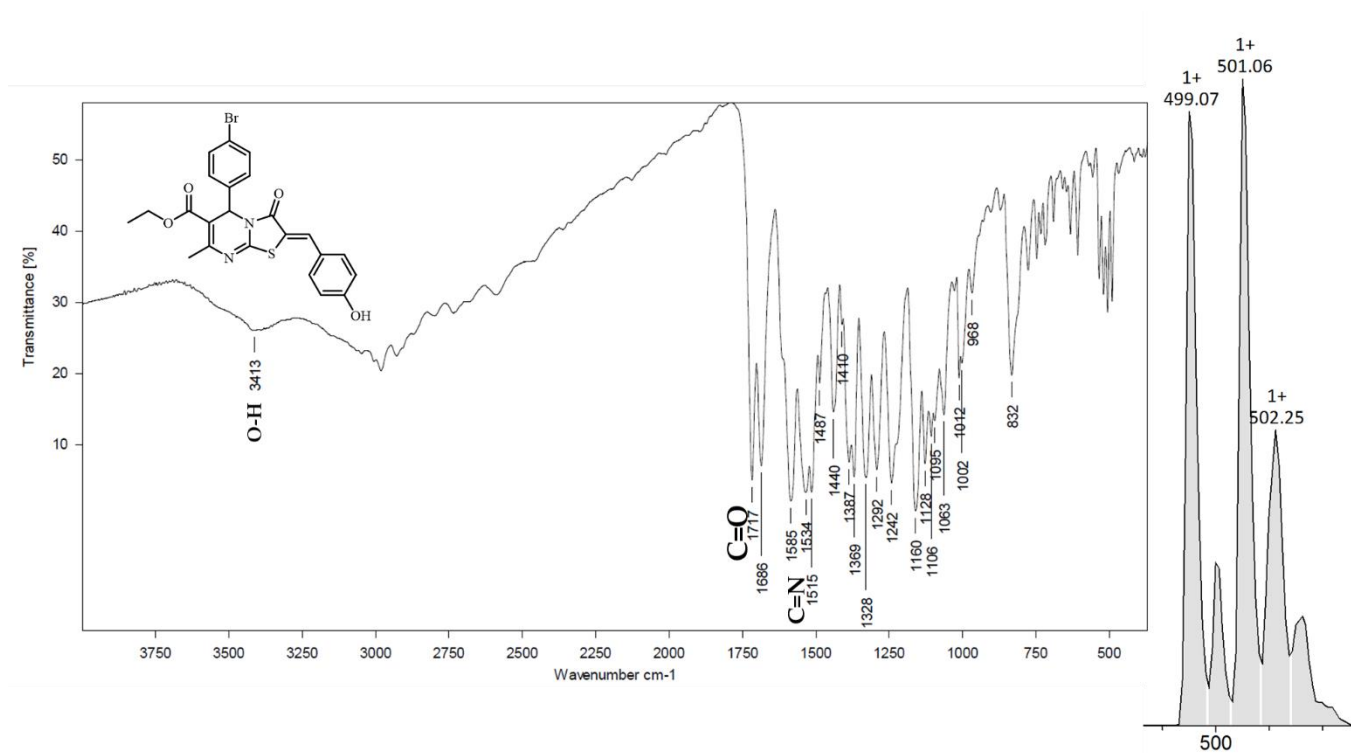



**Figure S16.**  $^1\text{H}$  NMR spectrum of compound **15** (DMSO- $d_6$ , 500 MHz, 25°C).

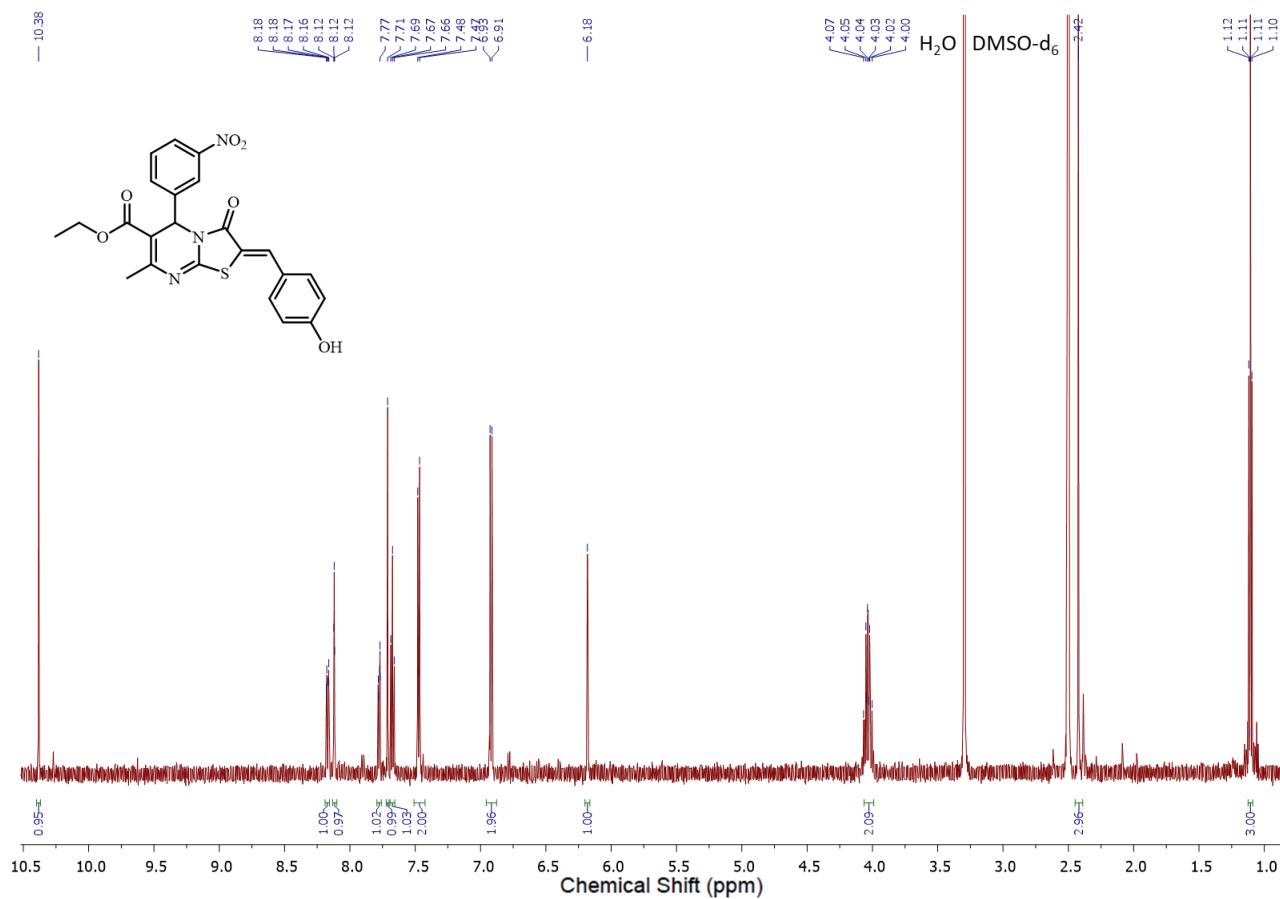

**Figure S17.**  $^{13}\text{C}$  NMR spectrum of compound **15** (DMSO- $d_6$ , 100 MHz, 25°C).

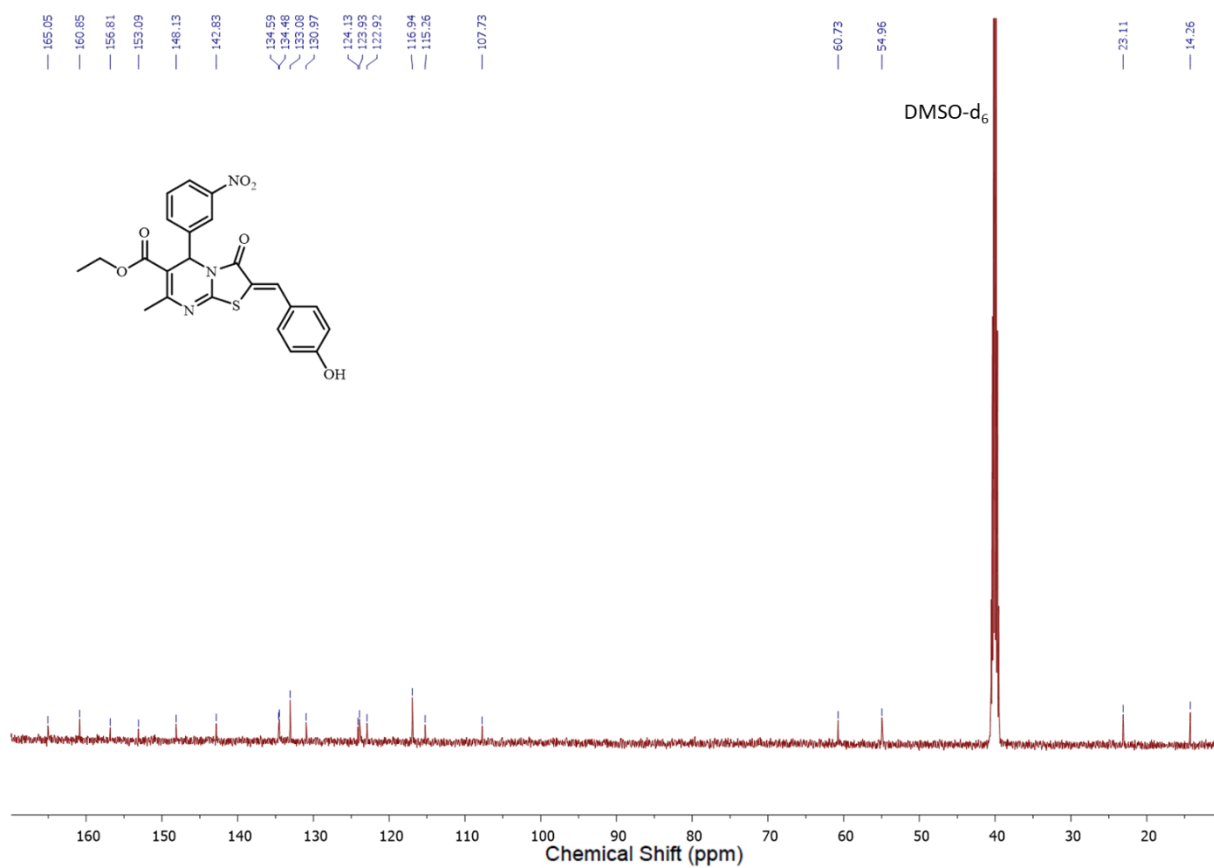

**Figure S18.** ESI MS spectrum of compound **15** (Ion Polarity: Positive).

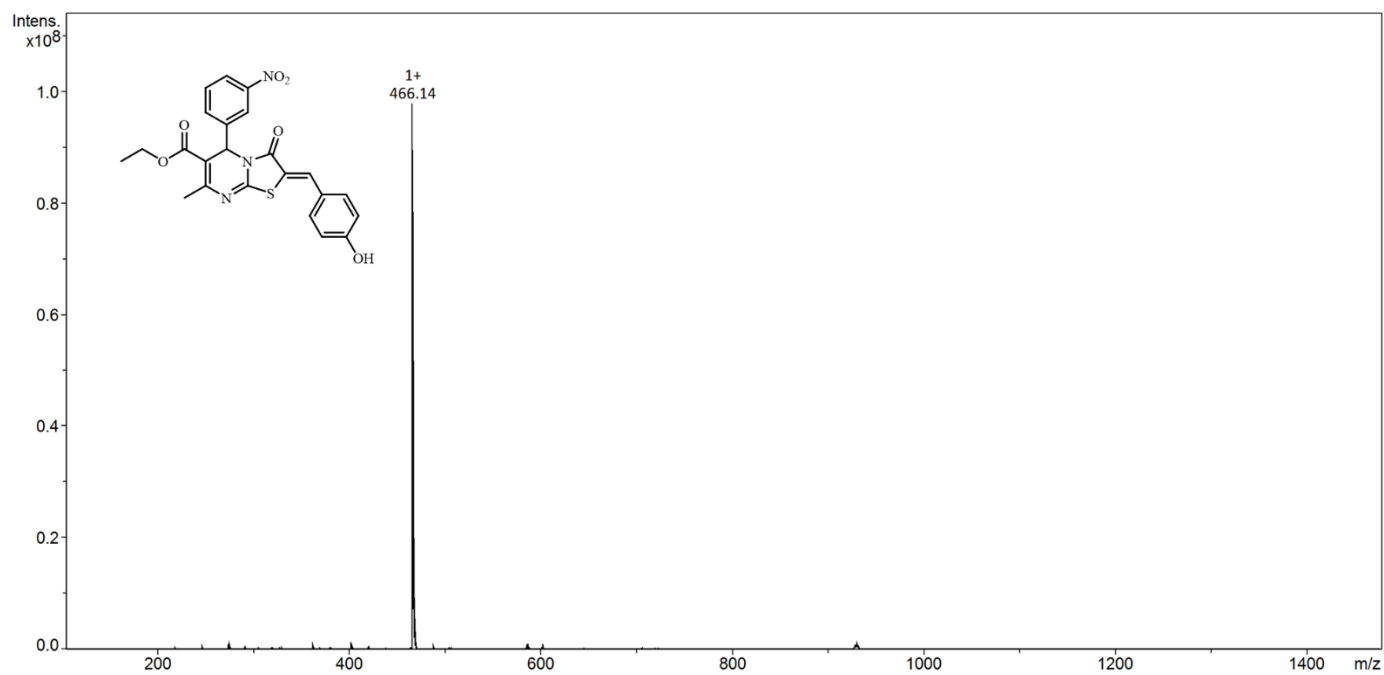

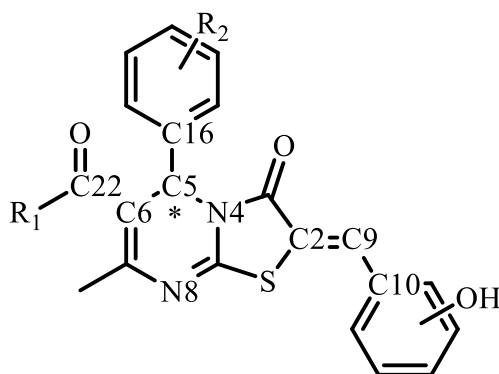

**Table S1.** Bond distances and angles of asymmetric C5 atom in studied compounds established by SCXRD.

| Compound      | 7 <sup>1</sup> | 8 <sup>1</sup> | 9 <sup>1</sup> | 9<br>DMSO | 10       | 11        | 12       | 12-<br>DMSO | 13       | 14       | 14-<br>DMSO |
|---------------|----------------|----------------|----------------|-----------|----------|-----------|----------|-------------|----------|----------|-------------|
| d(C5-C6), Å   | 1.515(3)       | 1.508(2)       | 1.522(1)       | 1.518(1)  | 1.530(2) | 1.522(2)  | 1.524(2) | 1.516(2)    | 1.514(1) | 1.522(3) | 1.519(2)    |
| d(N4-C5), Å   | 1.477(3)       | 1.481(2)       | 1.474(2)       | 1.475(1)  | 1.470(2) | 1.478(1)  | 1.481(2) | 1.475(1)    | 1.456(9) | 1.474(3) | 1.471(2)    |
| d(N4-C3), Å   | 1.391(3)       | 1.395(2)       | 1.383(1)       | 1.390(1)  | 1.403(2) | 1.371(2)  | 1.379(2) | 1.389(2)    | 1.388(1) | 1.395(2) | 1.387(2)    |
| d(C5-C16), Å  | 1.520(3)       | 1.533(2)       | 1.522(1)       | 1.518(1)  | 1.521(2) | 1.520(1)  | 1.520(2) | 1.524(2)    | 1.543(1) | 1.518(3) | 1.522(2)    |
| ∠C6-C5-N4, °  | 107.6(2)       | 109.34(2)      | 108.68(8)      | 107.65    | 108.3(1) | 108.39(8) | 108.5(1) | 107.0(1)    | 108.3(6) | 107.9(2) | 108.2(6)    |
| ∠C6-C5-C16, ° | 113.3(2)       | 114.68(2)      | 110.05(8)      | 113.50(7) | 110.9(1) | 113.74(8) | 112.7(1) | 114.4(1)    | 113.0(7) | 110.8(2) | 112.9(6)    |
| ∠N4-C5-C16, ° | 109.4(2)       | 110.39(2)      | 110.91(8)      | 109.79(7) | 110.2(1) | 111.02(8) | 110.2(1) | 109.7(1)    | 108.9(7) | 111.5(2) | 109.9(6)    |

**Table S2.** Selected bond distances and dihedral angles for studied compounds established by SCXRD.

| Compound       | Dihedral angle between thiazolopyrimidine and the carbonyl group at C6 atom $\pi$ -systems, ° | Dihedral angle between thiazolopyrimidine and phenyl substituent of benzylidene fragment $\pi$ -systems, ° | d(C2-C9), Å | d(C9-C10), Å | d(C6-C22), Å |
|----------------|-----------------------------------------------------------------------------------------------|------------------------------------------------------------------------------------------------------------|-------------|--------------|--------------|
| 7 <sup>1</sup> | 13.41                                                                                         | 2.40                                                                                                       | 1.345(3)    | 1.444(2)     | 1.486(2)     |
| 8 <sup>1</sup> | 9.96                                                                                          | 14.82                                                                                                      | 1.348(2)    | 1.450(3)     | 1.475(3)     |
| 9 <sup>1</sup> | 14.12                                                                                         | 6.24                                                                                                       | 1.350(1)    | 1.451(2)     | 1.485(2)     |
| 9 DMSO         | 15.09                                                                                         | 2.36                                                                                                       | 1.349(1)    | 1.449(1)     | 1.478(1)     |
| 10             | 10.09                                                                                         | 4.72                                                                                                       | 1.347(2)    | 1.450(2)     | 1.480(2)     |
| 11             | 39.13                                                                                         | 9.00                                                                                                       | 1.350(2)    | 1.452(1)     | 1.497(1)     |
| 12             | 9.26                                                                                          | 11.20                                                                                                      | 1.349(2)    | 1.450(2)     | 1.480(2)     |
| 12-DMSO        | 28.91                                                                                         | 7.34                                                                                                       | 1.343(2)    | 1.453(2)     | 1.474(2)     |
| 13             | 7.15                                                                                          | 4.81                                                                                                       | 1.367(2)    | 1.443(1)     | 1.472(1)     |
| 14             | 15.17                                                                                         | 6.62                                                                                                       | 1.350(3)    | 1.450(3)     | 1.480(3)     |
| 14-DMSO        | 17.68                                                                                         | 17.60                                                                                                      | 1.350(2)    | 1.446(2)     | 1.476(2)     |

**Table S3.** H- bond distances presenting in crystals of studied compounds.

| Compound                                 | 7-<br>EtOH <sup>1</sup> | 8 <sup>1</sup> | 9 <sup>1</sup> | 9<br>DMSO <sup>1</sup> | 10-<br>MeOH | 11        | 12       | 12-<br>DMSO | 13       | 14       | 14-<br>DMSO |
|------------------------------------------|-------------------------|----------------|----------------|------------------------|-------------|-----------|----------|-------------|----------|----------|-------------|
| d(O3-O11),<br>Å                          | -                       | -              | 2.696(1)       | -                      | -           | 2.672(1)  | 2.651(2) | -           | -        | -        | -           |
| d(O11-<br>ODMSO), Å                      | -                       | -              | -              | 2.664(1)               | -           | -         | -        | 2.624(1)    | -        | -        | 2.612(2)    |
| d(O13-N8),<br>Å                          | -                       | 2.687(1<br>)   | -              |                        | -           | -         | -        | -           | 2.725(9) | 2.797(2) | -           |
| d(O11-<br>O <sub>EtOH/MeOH</sub> ),<br>Å | 2.639(3)                | -              | -              | -                      | 2,712(1)    | -         | -        | -           | -        | -        | -           |
| ∠C11-O11-<br>O3, °                       | -                       | -              | 121.64(7)      | -                      | -           | 120.54(7) | 120.7(1) | -           | -        | -        | -           |
| ∠C11-O11-<br>ODMSO, °                    | -                       | -              | -              | 112.40(6)              | -           | -         | -        | 112.16(8)   | -        | -        | -           |
| ∠C13-O13-<br>ODMSO, °                    | -                       | -              | -              | -                      | -           | -         | -        | -           | -        | -        | 116.1(1)    |
| ∠C11-O11-<br>O <sub>EtOH/MeOH</sub> , °  | 118.0(1)                | -              | 109.99(8)      | -                      | -           | -         | -        | -           | -        | -        | -           |
| ∠C11-O11-<br>N8, °                       | -                       | 112.47(<br>1)  | -              | -                      | -           | -         | -        | -           | -        | -        | -           |
| ∠C13-O13-<br>N8, °                       | -                       | -              | -              | -                      | -           | -         | -        | -           | 120.3(5) | 116.1(1) | -           |

**Figure S19.** Fragment of crystal packing of **11-DMSO** showing the intermolecular H-, Br/ $\pi$ -, and  $\pi$ - $\pi$  bonding (red, brown and blue dotted lines, respectively).

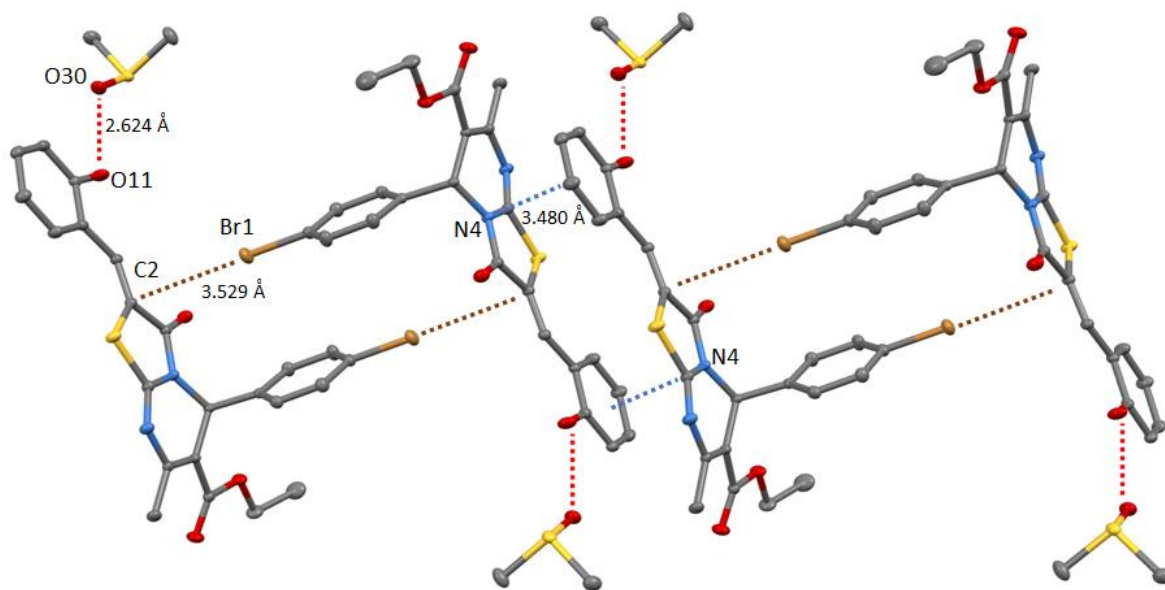

**Figure S20.** Fragment of crystal packing of **14** showing the intermolecular H-, Br/ $\pi$ -, and  $\pi$ - $\pi$  bonding (red, brown and blue dotted lines, respectively).

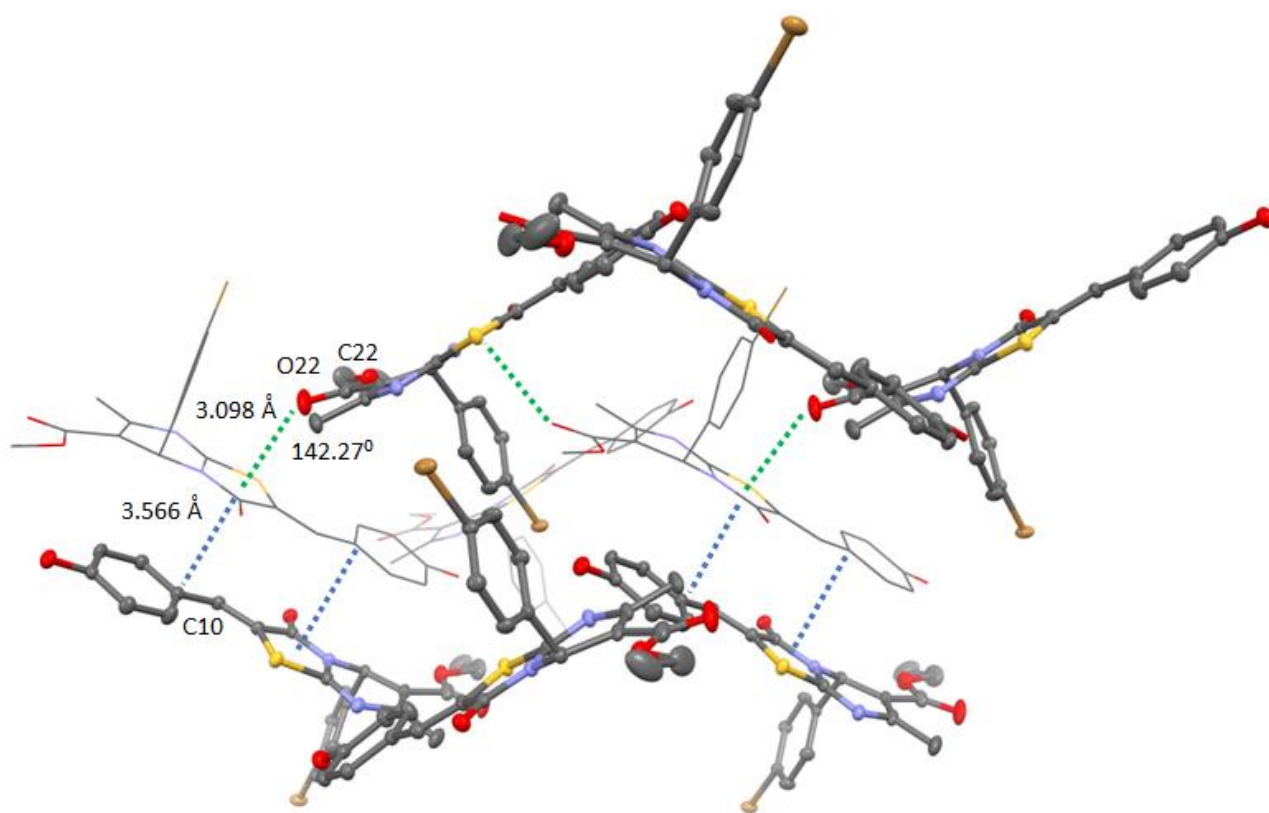

**Figure S21.** Fragment of crystal packing of **14-DMSO** showing the intermolecular H-, Br/ $\pi$ -, and  $\pi$ - $\pi$  bonding (red, brown and blue dotted lines, respectively).

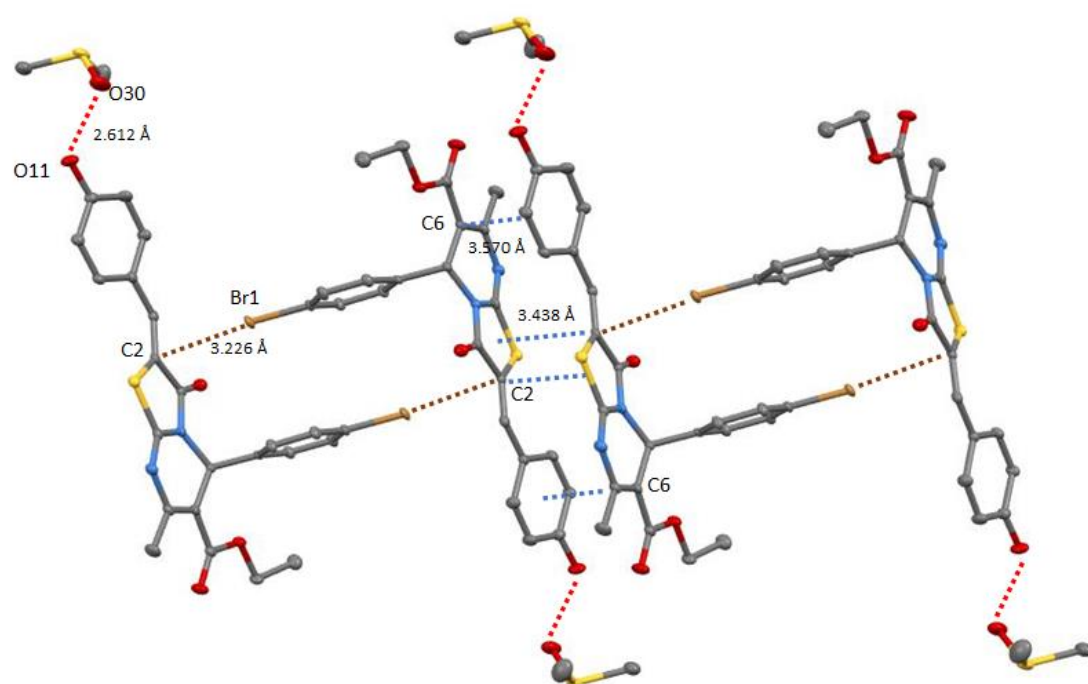

Supplement: s1 [file s1]
